# Supplementary material for: Temperate Bacteriophages (Prophages) in Pseudomonas aeruginosa Isolates Belonging to the International Cystic Fibrosis Clone (CC274)
Source: PubMed Central journal article supplement (PMC7546807; doi:10.3389/fmicb.2020.556706), 2020-09-25
Supplement: Image_1.pdf [file Image_1.pdf]

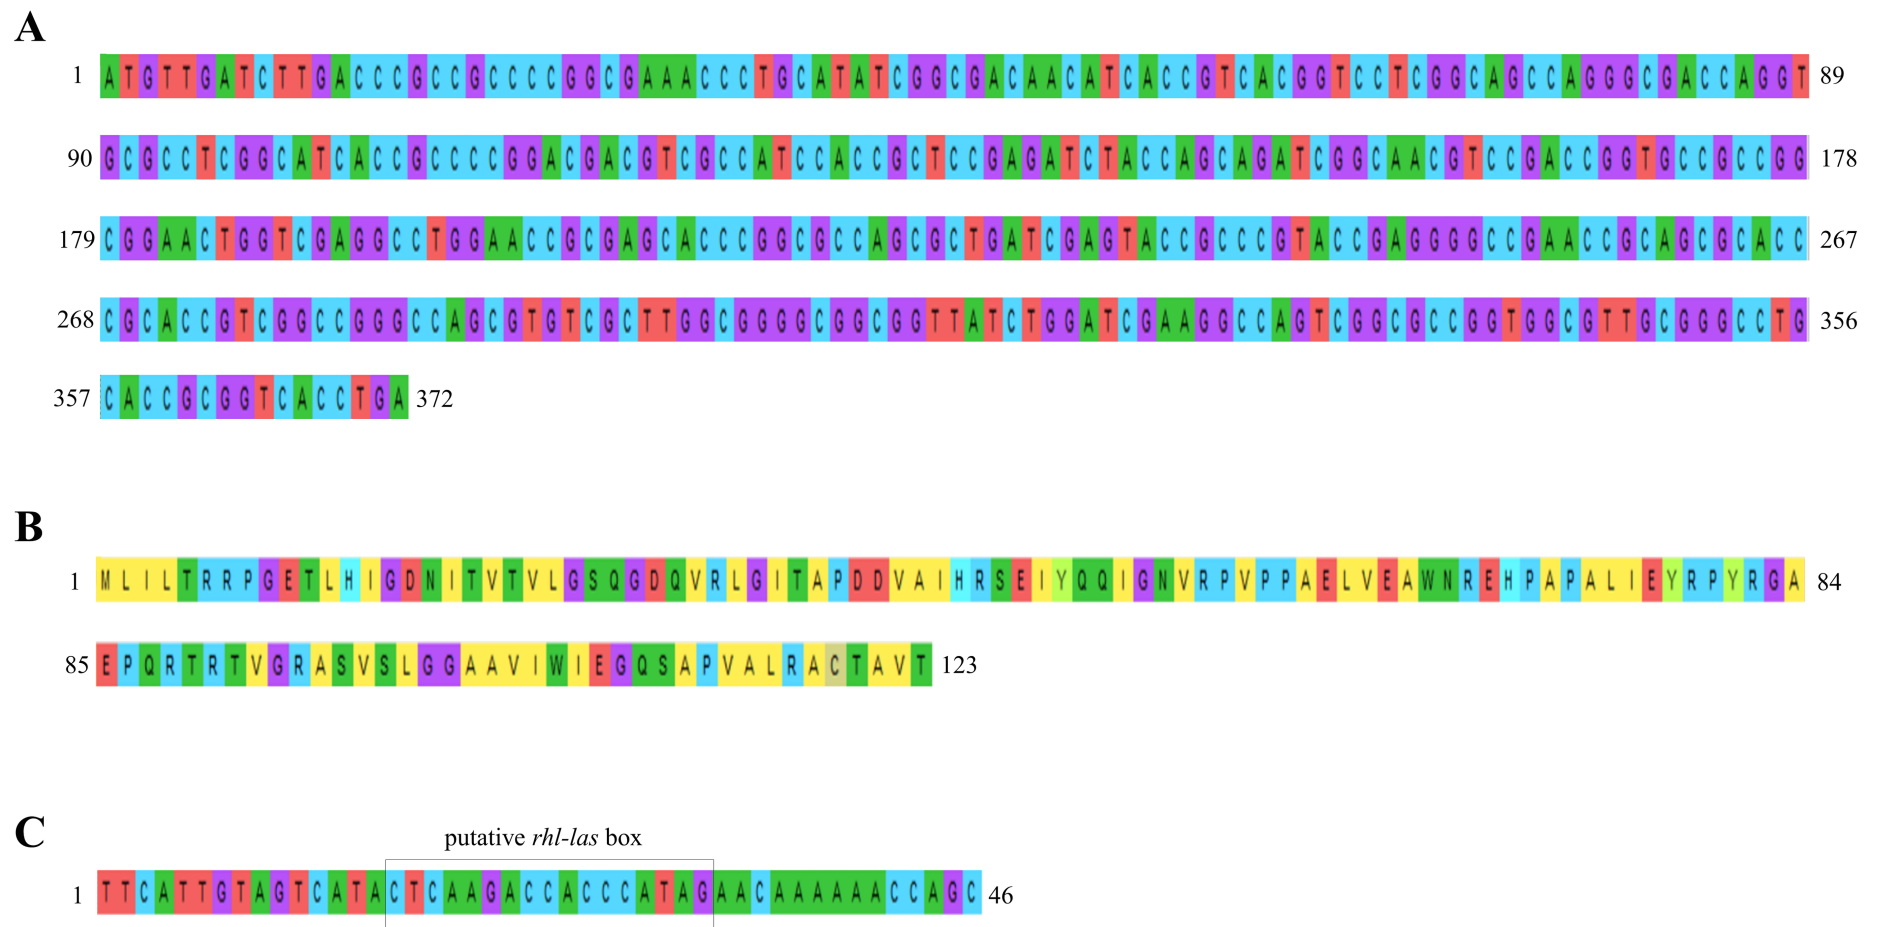

**Figure 1S.** Graphical representation of the nucleotide sequence of the *bci* gene (A), the protein sequence of the *Bci* protein (B) and the promoter region of the gene indicating the putative *rhl-las* box (C).
